# Supplementary material
Source: HighWire-hosted journal article supplement (https://bmjopen.bmj.com/content/13/2/e065707)
Supplement: inline-supplementary-material-1 [file inline-supplementary-material-1.pdf]

**SUPPLEMENTARY TABLES**

Supplementary Table 1 Comparison between Fried et al.'s suggested criteria for frailty and modified frailty indicators used in this study

| Frailty                  | Fried et al. (2001)                                                                                                                                                                                                                                                                                                                                                                                                                                                                                                                                                                                                                                                                                                                                                                                      | Current study                                                                                                                                                                                                                                                                                                                                                                                                                                                                                                                                                                                                                 |                                                             |         |        |             |        |             |        |         |        |              |  |         |        |             |          |             |        |         |        |                                                                                                                                                                                                                                                                                                                                                                                                                                                                                                                                                                                                                                                                                                                                                            |            |                                                             |         |        |             |        |             |        |         |        |              |  |         |        |             |          |             |        |         |        |
|--------------------------|----------------------------------------------------------------------------------------------------------------------------------------------------------------------------------------------------------------------------------------------------------------------------------------------------------------------------------------------------------------------------------------------------------------------------------------------------------------------------------------------------------------------------------------------------------------------------------------------------------------------------------------------------------------------------------------------------------------------------------------------------------------------------------------------------------|-------------------------------------------------------------------------------------------------------------------------------------------------------------------------------------------------------------------------------------------------------------------------------------------------------------------------------------------------------------------------------------------------------------------------------------------------------------------------------------------------------------------------------------------------------------------------------------------------------------------------------|-------------------------------------------------------------|---------|--------|-------------|--------|-------------|--------|---------|--------|--------------|--|---------|--------|-------------|----------|-------------|--------|---------|--------|------------------------------------------------------------------------------------------------------------------------------------------------------------------------------------------------------------------------------------------------------------------------------------------------------------------------------------------------------------------------------------------------------------------------------------------------------------------------------------------------------------------------------------------------------------------------------------------------------------------------------------------------------------------------------------------------------------------------------------------------------------|------------|-------------------------------------------------------------|---------|--------|-------------|--------|-------------|--------|---------|--------|--------------|--|---------|--------|-------------|----------|-------------|--------|---------|--------|
| <b>Exhaustion</b>        | <p>Questions from the Center for Epidemiologic Studies Depression Scale:<br/>           (a) I felt that everything I did was an effort<br/>           (b) I could not get going<br/>           How often in the last week did you feel this day?<br/>           0 = Rarely or none of the time (&lt;1 day)<br/>           1 = Some or a little of the time (1–2 days)<br/>           2 = A moderate amount of time (3–4 days)<br/>           3 = Most of the time</p> <p><b>Exhausted: “A moderate amount of time (3–4 days)” or “Most of the time”</b></p>                                                                                                                                                                                                                                              | <p>Hopkins Symptom Checklist (HSCL-10):<br/>           During the last week, have you experienced that everything is a struggle?<br/>           1 = No complaint<br/>           2 = Little complaint<br/>           3 = Pretty much<br/>           4 = Very much</p> <p><b>Exhausted: “Pretty much” or “Very much”</b></p>                                                                                                                                                                                                                                                                                                    |                                                             |         |        |             |        |             |        |         |        |              |  |         |        |             |          |             |        |         |        |                                                                                                                                                                                                                                                                                                                                                                                                                                                                                                                                                                                                                                                                                                                                                            |            |                                                             |         |        |             |        |             |        |         |        |              |  |         |        |             |          |             |        |         |        |
| <b>Physical activity</b> | <p>Minnesota Leisure Time Activity Questionnaire asking about walking, chores (moderately strenuous), mowing the lawn, raking, gardening, hiking, jogging, biking, exercise, cycling, dancing, aerobics, bowling, golf, singles, tennis, racquetball, calisthenics, swimming.<br/>           The kcal/week expended was calculated using a standardized algorithm. Lowest 20% were identified, resulting in following cut-off for frailty:<br/>           Men: &lt;383 kcal of physical activity/week<br/>           Women: &lt;270 kcal of physical activity/week</p>                                                                                                                                                                                                                                   | <p>Describe your exercise and physical exertion in leisure time over the last year (Saltin &amp; Grimby's Scale).<br/>           1 = Reading, watching TV/screen or other sedentary activity<br/>           2 = Walking, cycling, or other forms of exercise at least 4 hours a week<br/>           3 = Participation in recreational sports, heavy gardening, snow shoveling, etc. at least 4 hours a week<br/>           4 = Participation in hard training or sports competitions, regularly several times a week</p> <p><b>Low physical activity level: “Reading, watching TV/screen or other sedentary activity”</b></p> |                                                             |         |        |             |        |             |        |         |        |              |  |         |        |             |          |             |        |         |        |                                                                                                                                                                                                                                                                                                                                                                                                                                                                                                                                                                                                                                                                                                                                                            |            |                                                             |         |        |             |        |             |        |         |        |              |  |         |        |             |          |             |        |         |        |
| <b>Weight loss</b>       | <p>In the last year, have you lost more than 10 pounds (4.5 kg) unintentionally (not due to dieting or exercise)?</p> <p><b>Frail: “Yes”</b></p>                                                                                                                                                                                                                                                                                                                                                                                                                                                                                                                                                                                                                                                         | <p>Have you involuntarily lost weight during the last 6 months? (Malnutrition Universal Screening Tool)<br/>           0 = No<br/>           1 = Yes</p> <p><b>Lost weight: “Yes”</b></p>                                                                                                                                                                                                                                                                                                                                                                                                                                     |                                                             |         |        |             |        |             |        |         |        |              |  |         |        |             |          |             |        |         |        |                                                                                                                                                                                                                                                                                                                                                                                                                                                                                                                                                                                                                                                                                                                                                            |            |                                                             |         |        |             |        |             |        |         |        |              |  |         |        |             |          |             |        |         |        |
| <b>Grip strength</b>     | <p>Measured by Jamar dynamometer (kg)<br/>           Maximal strength in dominant hand (3 trials)<br/>           Stratified by sex and BMI quartiles. Lowest 20% were identified, resulting in the following cut-off for frailty:</p> <table border="0"> <tr> <td><b>Men</b></td> <td><b>Cut-off for grip strength (kg) criterion for frailty</b></td> </tr> <tr> <td>BMI ≤24</td> <td>≤29 kg</td> </tr> <tr> <td>BMI 24.1–26</td> <td>≤30 kg</td> </tr> <tr> <td>BMI 26.1–28</td> <td>≤30 kg</td> </tr> <tr> <td>BMI &gt;28</td> <td>≤32 kg</td> </tr> <tr> <td><b>Women</b></td> <td></td> </tr> <tr> <td>BMI ≤23</td> <td>≤17 kg</td> </tr> <tr> <td>BMI 23.1–26</td> <td>≤17.3 kg</td> </tr> <tr> <td>BMI 26.1–29</td> <td>≤18 kg</td> </tr> <tr> <td>BMI &gt;29</td> <td>≤21 kg</td> </tr> </table> | <b>Men</b>                                                                                                                                                                                                                                                                                                                                                                                                                                                                                                                                                                                                                    | <b>Cut-off for grip strength (kg) criterion for frailty</b> | BMI ≤24 | ≤29 kg | BMI 24.1–26 | ≤30 kg | BMI 26.1–28 | ≤30 kg | BMI >28 | ≤32 kg | <b>Women</b> |  | BMI ≤23 | ≤17 kg | BMI 23.1–26 | ≤17.3 kg | BMI 26.1–29 | ≤18 kg | BMI >29 | ≤21 kg | <p>Measured by Jamar dynamometer (kg)<br/>           Strongest measurement from 3 trials in each hand<br/>           Stratified by sex and BMI quartiles as per Fried's definition:</p> <table border="0"> <tr> <td><b>Men</b></td> <td><b>Cut-off for grip strength (kg) criterion for frailty</b></td> </tr> <tr> <td>BMI ≤24</td> <td>≤29 kg</td> </tr> <tr> <td>BMI 24.1–26</td> <td>≤30 kg</td> </tr> <tr> <td>BMI 26.1–28</td> <td>≤30 kg</td> </tr> <tr> <td>BMI &gt;28</td> <td>≤32 kg</td> </tr> <tr> <td><b>Women</b></td> <td></td> </tr> <tr> <td>BMI ≤23</td> <td>≤17 kg</td> </tr> <tr> <td>BMI 23.1–26</td> <td>≤17.3 kg</td> </tr> <tr> <td>BMI 26.1–29</td> <td>≤18 kg</td> </tr> <tr> <td>BMI &gt;29</td> <td>≤21 kg</td> </tr> </table> | <b>Men</b> | <b>Cut-off for grip strength (kg) criterion for frailty</b> | BMI ≤24 | ≤29 kg | BMI 24.1–26 | ≤30 kg | BMI 26.1–28 | ≤30 kg | BMI >28 | ≤32 kg | <b>Women</b> |  | BMI ≤23 | ≤17 kg | BMI 23.1–26 | ≤17.3 kg | BMI 26.1–29 | ≤18 kg | BMI >29 | ≤21 kg |
| <b>Men</b>               | <b>Cut-off for grip strength (kg) criterion for frailty</b>                                                                                                                                                                                                                                                                                                                                                                                                                                                                                                                                                                                                                                                                                                                                              |                                                                                                                                                                                                                                                                                                                                                                                                                                                                                                                                                                                                                               |                                                             |         |        |             |        |             |        |         |        |              |  |         |        |             |          |             |        |         |        |                                                                                                                                                                                                                                                                                                                                                                                                                                                                                                                                                                                                                                                                                                                                                            |            |                                                             |         |        |             |        |             |        |         |        |              |  |         |        |             |          |             |        |         |        |
| BMI ≤24                  | ≤29 kg                                                                                                                                                                                                                                                                                                                                                                                                                                                                                                                                                                                                                                                                                                                                                                                                   |                                                                                                                                                                                                                                                                                                                                                                                                                                                                                                                                                                                                                               |                                                             |         |        |             |        |             |        |         |        |              |  |         |        |             |          |             |        |         |        |                                                                                                                                                                                                                                                                                                                                                                                                                                                                                                                                                                                                                                                                                                                                                            |            |                                                             |         |        |             |        |             |        |         |        |              |  |         |        |             |          |             |        |         |        |
| BMI 24.1–26              | ≤30 kg                                                                                                                                                                                                                                                                                                                                                                                                                                                                                                                                                                                                                                                                                                                                                                                                   |                                                                                                                                                                                                                                                                                                                                                                                                                                                                                                                                                                                                                               |                                                             |         |        |             |        |             |        |         |        |              |  |         |        |             |          |             |        |         |        |                                                                                                                                                                                                                                                                                                                                                                                                                                                                                                                                                                                                                                                                                                                                                            |            |                                                             |         |        |             |        |             |        |         |        |              |  |         |        |             |          |             |        |         |        |
| BMI 26.1–28              | ≤30 kg                                                                                                                                                                                                                                                                                                                                                                                                                                                                                                                                                                                                                                                                                                                                                                                                   |                                                                                                                                                                                                                                                                                                                                                                                                                                                                                                                                                                                                                               |                                                             |         |        |             |        |             |        |         |        |              |  |         |        |             |          |             |        |         |        |                                                                                                                                                                                                                                                                                                                                                                                                                                                                                                                                                                                                                                                                                                                                                            |            |                                                             |         |        |             |        |             |        |         |        |              |  |         |        |             |          |             |        |         |        |
| BMI >28                  | ≤32 kg                                                                                                                                                                                                                                                                                                                                                                                                                                                                                                                                                                                                                                                                                                                                                                                                   |                                                                                                                                                                                                                                                                                                                                                                                                                                                                                                                                                                                                                               |                                                             |         |        |             |        |             |        |         |        |              |  |         |        |             |          |             |        |         |        |                                                                                                                                                                                                                                                                                                                                                                                                                                                                                                                                                                                                                                                                                                                                                            |            |                                                             |         |        |             |        |             |        |         |        |              |  |         |        |             |          |             |        |         |        |
| <b>Women</b>             |                                                                                                                                                                                                                                                                                                                                                                                                                                                                                                                                                                                                                                                                                                                                                                                                          |                                                                                                                                                                                                                                                                                                                                                                                                                                                                                                                                                                                                                               |                                                             |         |        |             |        |             |        |         |        |              |  |         |        |             |          |             |        |         |        |                                                                                                                                                                                                                                                                                                                                                                                                                                                                                                                                                                                                                                                                                                                                                            |            |                                                             |         |        |             |        |             |        |         |        |              |  |         |        |             |          |             |        |         |        |
| BMI ≤23                  | ≤17 kg                                                                                                                                                                                                                                                                                                                                                                                                                                                                                                                                                                                                                                                                                                                                                                                                   |                                                                                                                                                                                                                                                                                                                                                                                                                                                                                                                                                                                                                               |                                                             |         |        |             |        |             |        |         |        |              |  |         |        |             |          |             |        |         |        |                                                                                                                                                                                                                                                                                                                                                                                                                                                                                                                                                                                                                                                                                                                                                            |            |                                                             |         |        |             |        |             |        |         |        |              |  |         |        |             |          |             |        |         |        |
| BMI 23.1–26              | ≤17.3 kg                                                                                                                                                                                                                                                                                                                                                                                                                                                                                                                                                                                                                                                                                                                                                                                                 |                                                                                                                                                                                                                                                                                                                                                                                                                                                                                                                                                                                                                               |                                                             |         |        |             |        |             |        |         |        |              |  |         |        |             |          |             |        |         |        |                                                                                                                                                                                                                                                                                                                                                                                                                                                                                                                                                                                                                                                                                                                                                            |            |                                                             |         |        |             |        |             |        |         |        |              |  |         |        |             |          |             |        |         |        |
| BMI 26.1–29              | ≤18 kg                                                                                                                                                                                                                                                                                                                                                                                                                                                                                                                                                                                                                                                                                                                                                                                                   |                                                                                                                                                                                                                                                                                                                                                                                                                                                                                                                                                                                                                               |                                                             |         |        |             |        |             |        |         |        |              |  |         |        |             |          |             |        |         |        |                                                                                                                                                                                                                                                                                                                                                                                                                                                                                                                                                                                                                                                                                                                                                            |            |                                                             |         |        |             |        |             |        |         |        |              |  |         |        |             |          |             |        |         |        |
| BMI >29                  | ≤21 kg                                                                                                                                                                                                                                                                                                                                                                                                                                                                                                                                                                                                                                                                                                                                                                                                   |                                                                                                                                                                                                                                                                                                                                                                                                                                                                                                                                                                                                                               |                                                             |         |        |             |        |             |        |         |        |              |  |         |        |             |          |             |        |         |        |                                                                                                                                                                                                                                                                                                                                                                                                                                                                                                                                                                                                                                                                                                                                                            |            |                                                             |         |        |             |        |             |        |         |        |              |  |         |        |             |          |             |        |         |        |
| <b>Men</b>               | <b>Cut-off for grip strength (kg) criterion for frailty</b>                                                                                                                                                                                                                                                                                                                                                                                                                                                                                                                                                                                                                                                                                                                                              |                                                                                                                                                                                                                                                                                                                                                                                                                                                                                                                                                                                                                               |                                                             |         |        |             |        |             |        |         |        |              |  |         |        |             |          |             |        |         |        |                                                                                                                                                                                                                                                                                                                                                                                                                                                                                                                                                                                                                                                                                                                                                            |            |                                                             |         |        |             |        |             |        |         |        |              |  |         |        |             |          |             |        |         |        |
| BMI ≤24                  | ≤29 kg                                                                                                                                                                                                                                                                                                                                                                                                                                                                                                                                                                                                                                                                                                                                                                                                   |                                                                                                                                                                                                                                                                                                                                                                                                                                                                                                                                                                                                                               |                                                             |         |        |             |        |             |        |         |        |              |  |         |        |             |          |             |        |         |        |                                                                                                                                                                                                                                                                                                                                                                                                                                                                                                                                                                                                                                                                                                                                                            |            |                                                             |         |        |             |        |             |        |         |        |              |  |         |        |             |          |             |        |         |        |
| BMI 24.1–26              | ≤30 kg                                                                                                                                                                                                                                                                                                                                                                                                                                                                                                                                                                                                                                                                                                                                                                                                   |                                                                                                                                                                                                                                                                                                                                                                                                                                                                                                                                                                                                                               |                                                             |         |        |             |        |             |        |         |        |              |  |         |        |             |          |             |        |         |        |                                                                                                                                                                                                                                                                                                                                                                                                                                                                                                                                                                                                                                                                                                                                                            |            |                                                             |         |        |             |        |             |        |         |        |              |  |         |        |             |          |             |        |         |        |
| BMI 26.1–28              | ≤30 kg                                                                                                                                                                                                                                                                                                                                                                                                                                                                                                                                                                                                                                                                                                                                                                                                   |                                                                                                                                                                                                                                                                                                                                                                                                                                                                                                                                                                                                                               |                                                             |         |        |             |        |             |        |         |        |              |  |         |        |             |          |             |        |         |        |                                                                                                                                                                                                                                                                                                                                                                                                                                                                                                                                                                                                                                                                                                                                                            |            |                                                             |         |        |             |        |             |        |         |        |              |  |         |        |             |          |             |        |         |        |
| BMI >28                  | ≤32 kg                                                                                                                                                                                                                                                                                                                                                                                                                                                                                                                                                                                                                                                                                                                                                                                                   |                                                                                                                                                                                                                                                                                                                                                                                                                                                                                                                                                                                                                               |                                                             |         |        |             |        |             |        |         |        |              |  |         |        |             |          |             |        |         |        |                                                                                                                                                                                                                                                                                                                                                                                                                                                                                                                                                                                                                                                                                                                                                            |            |                                                             |         |        |             |        |             |        |         |        |              |  |         |        |             |          |             |        |         |        |
| <b>Women</b>             |                                                                                                                                                                                                                                                                                                                                                                                                                                                                                                                                                                                                                                                                                                                                                                                                          |                                                                                                                                                                                                                                                                                                                                                                                                                                                                                                                                                                                                                               |                                                             |         |        |             |        |             |        |         |        |              |  |         |        |             |          |             |        |         |        |                                                                                                                                                                                                                                                                                                                                                                                                                                                                                                                                                                                                                                                                                                                                                            |            |                                                             |         |        |             |        |             |        |         |        |              |  |         |        |             |          |             |        |         |        |
| BMI ≤23                  | ≤17 kg                                                                                                                                                                                                                                                                                                                                                                                                                                                                                                                                                                                                                                                                                                                                                                                                   |                                                                                                                                                                                                                                                                                                                                                                                                                                                                                                                                                                                                                               |                                                             |         |        |             |        |             |        |         |        |              |  |         |        |             |          |             |        |         |        |                                                                                                                                                                                                                                                                                                                                                                                                                                                                                                                                                                                                                                                                                                                                                            |            |                                                             |         |        |             |        |             |        |         |        |              |  |         |        |             |          |             |        |         |        |
| BMI 23.1–26              | ≤17.3 kg                                                                                                                                                                                                                                                                                                                                                                                                                                                                                                                                                                                                                                                                                                                                                                                                 |                                                                                                                                                                                                                                                                                                                                                                                                                                                                                                                                                                                                                               |                                                             |         |        |             |        |             |        |         |        |              |  |         |        |             |          |             |        |         |        |                                                                                                                                                                                                                                                                                                                                                                                                                                                                                                                                                                                                                                                                                                                                                            |            |                                                             |         |        |             |        |             |        |         |        |              |  |         |        |             |          |             |        |         |        |
| BMI 26.1–29              | ≤18 kg                                                                                                                                                                                                                                                                                                                                                                                                                                                                                                                                                                                                                                                                                                                                                                                                   |                                                                                                                                                                                                                                                                                                                                                                                                                                                                                                                                                                                                                               |                                                             |         |        |             |        |             |        |         |        |              |  |         |        |             |          |             |        |         |        |                                                                                                                                                                                                                                                                                                                                                                                                                                                                                                                                                                                                                                                                                                                                                            |            |                                                             |         |        |             |        |             |        |         |        |              |  |         |        |             |          |             |        |         |        |
| BMI >29                  | ≤21 kg                                                                                                                                                                                                                                                                                                                                                                                                                                                                                                                                                                                                                                                                                                                                                                                                   |                                                                                                                                                                                                                                                                                                                                                                                                                                                                                                                                                                                                                               |                                                             |         |        |             |        |             |        |         |        |              |  |         |        |             |          |             |        |         |        |                                                                                                                                                                                                                                                                                                                                                                                                                                                                                                                                                                                                                                                                                                                                                            |            |                                                             |         |        |             |        |             |        |         |        |              |  |         |        |             |          |             |        |         |        |

| Frailty               | Fried et al. (2001)                                                                                                                                                                                                                                                                                                                                                                                          | Current study                                                                                                                                                                                                                                                                                                                                                                                                |
|-----------------------|--------------------------------------------------------------------------------------------------------------------------------------------------------------------------------------------------------------------------------------------------------------------------------------------------------------------------------------------------------------------------------------------------------------|--------------------------------------------------------------------------------------------------------------------------------------------------------------------------------------------------------------------------------------------------------------------------------------------------------------------------------------------------------------------------------------------------------------|
| <b>Walking speed</b>  | Time to walk (seconds) <u>15 feet</u> at <u>usual pace</u> stratified by sex and height (gender-specific cut-off at medium height): Lowest 20% were identified, resulting in the following cut-off for frailty:<br><b>Men</b> <b>Cut-off for walking speed criterion for frailty</b><br>Height ≤173 cm    ≥7 s<br>Height >173 cm    ≥6 s<br><b>Women</b><br>Height ≤159 cm    ≥7 s<br>Height >159 cm    ≥6 s | SPPB: Short Physical Performance Battery – walking test<br>Fastest of two times (seconds) to walk 4 m stratified by sex and height according to Fried's gender-specific cut-off. Converted to feet from meters.<br><b>Men</b> <b>Cut-off for walking speed criterion for frailty</b><br>Height ≤173 cm    ≥7 s<br>Height >173 cm    ≥6 s<br><b>Women</b><br>Height ≤159 cm    ≥7 s<br>Height >159 cm    ≥6 s |
| <b>Frailty status</b> | Frailty score:<br>0 = Robust<br>1–2 = Pre-frail<br>≥3 = Frail                                                                                                                                                                                                                                                                                                                                                | Frailty score:<br>0 = Robust<br>1–2 = Pre-frail<br>≥3 = Frail<br><br>Pre-frailty/frailty score:<br>0 = Robust<br>≥1 = Pre-frail/frail                                                                                                                                                                                                                                                                        |

Supplementary Table 2 Descriptive characteristics of participants at follow-up: The Tromsø Study 2015-2016

|                                             | Frailty status                    |                                             | P value             |
|---------------------------------------------|-----------------------------------|---------------------------------------------|---------------------|
|                                             | Robust<br>(% (n))<br>70.5 (3,179) | Pre-frail/ frail<br>(% (n))<br>29.5 (1,330) |                     |
| Age in years, mean (SD)                     | 72.1 (5.1)                        | 73.8 (5.9)                                  | <0.001 <sup>a</sup> |
| <b>Women</b>                                | 50.6 (1608)                       | 55.0 (732)                                  | 0.006               |
| <b>Smoking status</b>                       |                                   |                                             |                     |
| Current smokers                             | 8.3 (262)                         | 14.4 (188)                                  |                     |
| Former smokers                              | 53.2 (1,674)                      | 50.8 (666)                                  | <0.001              |
| Never                                       | 38.4 (1,208)                      | 34.8 (456)                                  |                     |
| <b>Married or cohabiting</b>                | 71.0 (2,258)                      | 64.6 (859)                                  | <0.001              |
| <b>Self-perceived health – good</b>         | 69.4 (2,178)                      | 43.2 (566)                                  | <0.001              |
| <b>Social support – enough good friends</b> | 87.4 (2,676)                      | 82.0 (1,047)                                | <0.001              |
| <b>Educational level</b>                    |                                   |                                             |                     |
| Primary/Partly secondary                    | 39.1 (1,201)                      | 50 (632)                                    |                     |
| Upper secondary                             | 26.6 (817)                        | 26.2 (331)                                  | <0.001              |
| College/University short                    | 16.3 (500)                        | 12.2 (154)                                  |                     |
| College/University long                     | 18.1 (556)                        | 11.6 (147)                                  |                     |
| <b>Alcohol intake</b>                       |                                   |                                             |                     |
| Never/Abstaining                            | 11.2 (352)                        | 17.4 (229)                                  |                     |
| Infrequent drinkers                         | 58.6 (1,846)                      | 61.0 (803)                                  | <0.001              |
| Frequent drinkers                           | 30.3 (954)                        | 21.6 (284)                                  |                     |
| <b>Prevalent diseases</b>                   |                                   |                                             |                     |
| Pulmonary disease <sup>b</sup>              | 14.6 (444)                        | 19.9 (250)                                  | <0.001              |
| Coronary heart disease <sup>c</sup>         | 13.7 (415)                        | 19.3 (241)                                  | <0.001              |
| Diabetes                                    | 7.3 (224)                         | 14.8 (186)                                  | <0.001              |
| Cancer                                      | 15.6 (475)                        | 19.3 (243)                                  | 0.003               |
| Stroke                                      | 5.1 (154)                         | 8.1 (101)                                   | <0.001              |
| Peptic ulcer                                | –                                 | –                                           | <0.001              |
| <b>Comorbidity</b>                          | 89.8 (2,800)                      | 82.4 (1,075)                                | <0.001              |
| <b>BMI categories</b>                       |                                   |                                             |                     |
| Underweight                                 | 0.5 (17)                          | 1.4 (18)                                    |                     |
| Normal                                      | 30.0 (951)                        | 24.5 (323)                                  | <0.001              |
| Overweight                                  | 49.4 (1,566)                      | 41.4 (547)                                  |                     |
| Obese                                       | 20.1 (639)                        | 32.7 (432)                                  |                     |
| <b>WC categories</b>                        |                                   |                                             |                     |
| Normal                                      | 22.6 (716)                        | 17.1 (225)                                  |                     |
| Moderately high                             | 28.0 (888)                        | 21.3 (281)                                  | <0.001              |
| High                                        | 49.4 (1,569)                      | 61.6 (812)                                  |                     |

Values are percentage (number); P value:  $\chi^2$  test for categorical variables P value: <sup>a</sup>Student's t-test; <sup>b</sup>including asthma/chronic bronchitis/emphysema; <sup>c</sup>including angina pectoris/myocardial infarction. BMI, body mass index; WC, waist circumference.

|                                         |                                                |
|-----------------------------------------|------------------------------------------------|
| <b>BMI categories</b>                   | <b>WC categories</b>                           |
| Underweight: <18.5 kg/m <sup>2</sup>    | Normal: men ≤94 cm; women ≤80 cm               |
| Normal: 18.5–24.9 kg/m <sup>2</sup>     | Moderately high: men 95–102 cm; women 81–88 cm |
| Overweight: 25.0–29.9 kg/m <sup>2</sup> | High: men >102 cm; women >88 cm                |
| Obesity: ≥30 kg/m <sup>2</sup>          |                                                |

Supplementary Table 3 Descriptive baseline characteristics of Tromsø4 participants who attended Tromsø7 versus those who did not: The Tromsø Study 1994–2016

|                                             | Frailty status                               |                                          | P value             |
|---------------------------------------------|----------------------------------------------|------------------------------------------|---------------------|
|                                             | Not attended Tromsø7<br>n = 8,649<br>(% (n)) | Attended Tromsø7<br>n = 4,809<br>(% (n)) |                     |
| <b>Age in years, mean (SD)</b>              | 63.2 (11.0)                                  | 52.0 (5.8)                               | <0.001 <sup>a</sup> |
| <b>Women</b>                                | 52.4 (4,533)                                 | 52.4 (2520)                              | 0.990               |
| <b>Smoking status</b>                       |                                              |                                          |                     |
| Current smokers                             | 33.7 (2,916)                                 | 29.4 (1,414)                             |                     |
| Former smokers                              | 33.4 (2,886)                                 | 35.6 (1,714)                             | <0.001              |
| Never                                       | 32.9 (2,847)                                 | (34.9) 1,681                             |                     |
| <b>Married or cohabiting</b>                | 64.7 (5,568)                                 | (82.7) 3,977                             | <0.001              |
| <b>Self-perceived health status – good</b>  | 50.7 (4,378)                                 | (70.3) 3,379                             | <0.001              |
| <b>Social support – enough good friends</b> | 83.0 (5,775)                                 | (82.2) 3,590                             | 0.330               |
| <b>Educational level</b>                    |                                              |                                          |                     |
| Primary/Partly secondary                    | 57.2 (4,911)                                 | (36.9) 1,768                             |                     |
| Upper secondary                             | 27.5 (2,362)                                 | (34.1) 1,633                             | <0.001              |
| College/University short                    | 8.1 (696)                                    | (14.9) 716                               |                     |
| College/University long                     | 7.2 (622)                                    | (14.1) 678                               |                     |
| <b>Alcohol intake</b>                       |                                              |                                          |                     |
| Never/Abstaining                            | 24.5 (2,108)                                 | (10.2) 491                               |                     |
| Infrequent drinkers                         | 66.8 (5,749)                                 | (76.2) 3655                              | <0.001              |
| Frequent drinkers                           | 8.7 (744)                                    | (13.5) 649                               |                     |
| <b>Prevalent diseases</b>                   |                                              |                                          |                     |
| Pulmonary disease <sup>b</sup>              | 16.2 (1,097)                                 | (9.9) 430                                | <0.001              |
| Coronary heart disease <sup>c</sup>         | 14.8 (1,281)                                 | (3.1) 149                                | <0.001              |
| Diabetes                                    | 4.3 (374)                                    | (0.5) 25                                 | <0.001              |
| Cancer                                      | 7.7 (517)                                    | (3.1) 132                                | <0.001              |
| Stroke                                      | 3.7 (318)                                    | (0.7) 33                                 | <0.001              |
| Ulcer                                       | 14.1 (908)                                   | (7.8) 333                                | <0.001              |
| <b>Comorbidity</b>                          | 9.9 (858)                                    | (2.3) 36                                 | <0.001              |
| <b>BMI categories</b>                       |                                              |                                          |                     |
| Underweight                                 | 1.7 (149)                                    | 0.5 (22)                                 |                     |
| Normal                                      | 40.0 (3,463)                                 | 44.9 (2,169)                             | <0.001              |
| Overweight                                  | 42.3 (3,659)                                 | 43.5 (2,094)                             |                     |
| Obesity                                     | 15.9 (1,378)                                 | 11.1 (533)                               |                     |
| <b>WC categories</b>                        |                                              |                                          |                     |
| Normal                                      | 39.0 (1,784)                                 | 45 (765)                                 |                     |
| Moderately high                             | 29.7 (1,356)                                 | 32.6 (554)                               | <0.001              |
| High                                        | 31.3 (1,434)                                 | 22.4 (381)                               |                     |

Values are percentage (number); P value:  $\chi^2$  test for categorical variables P value: <sup>a</sup>Student's t-test; <sup>b</sup>including asthma/chronic bronchitis/emphysema; <sup>c</sup>including angina pectoris/myocardial infarction. BMI, body mass index; WC, waist circumference.

|                                         |                                                |
|-----------------------------------------|------------------------------------------------|
| <b>BMI categories</b>                   | <b>WC categories</b>                           |
| Underweight: <18.5 kg/m <sup>2</sup>    | Normal: men ≤94 cm; women ≤80 cm               |
| Normal: 18.5–24.9 kg/m <sup>2</sup>     | Moderately high: men 95–102 cm; women 81–88 cm |
| Overweight: 25.0–29.9 kg/m <sup>2</sup> | High: men >102 cm; women >88 cm                |
| Obesity: ≥30 kg/m <sup>2</sup>          |                                                |

**Supplementary Table 4 Cross-sectional association between BMI and WC, and pre-frailty/frailty: The Tromsø Study 2015–2016**

|                              | Frailty status    |                            | Model 1           | Model 2           |
|------------------------------|-------------------|----------------------------|-------------------|-------------------|
|                              | Robust<br>(% (n)) | Pre-frail/frail<br>(% (n)) | OR (95% CI)       | OR (95% CI)       |
| <b>BMI, kg/m<sup>2</sup></b> | 70.5 (3179)       | 29.5 (1330)                |                   |                   |
| Underweight                  | 0.5 (17)          | 1.4 (18)                   | 2.93 (1.48–5.83)  | 2.32 (1.09–4.94)  |
| Normal                       | 30.0 (951)        | 24.5 (323)                 | Ref.              | Ref.              |
| Overweight                   | 49.4 (1,566)      | 41.4 (547)                 | 1.07 (0.91–1.26)  | 1.03 (0.86–1.23)  |
| Obesity                      | 20.1 (639)        | 32.7 (432)                 | 2.14 (1.79–2.56)  | 1.88 (1.54–2.30)  |
| <b>WC, cm</b>                |                   |                            |                   |                   |
| Normal                       | 22.6 (716)        | 17.1 (225)                 | Ref.              | Ref.              |
| Moderately high              | 28.0 (888)        | 21.3 (281)                 | 1.02 (0.83–1.25)* | 1.01 (0.81–1.26)* |
| High                         | 49.4 (1,569)      | 61.6 (812)                 | 1.69 (1.42–2.01)* | 1.45 (1.20–1.76)* |

Model 1: minimally adjusted for age and sex (\*excluding sex) at Tromsø7.

Model 2: adjusted for age, sex, educational level, smoking status, alcohol intake, comorbidities, social support, and self-perceived health (\*excluding sex) at Tromsø7.

BMI, body mass index; CI, confidence interval; OR: odds ratio; WC, waist circumference.

Supplementary Table 5 Longitudinal association between BMI and WC, combined profiles and trajectories, and pre-frailty/frailty: The Tromsø Study 1994–2016

|                                        | Frailty status    |                                    | Model 1            | Model 2            |
|----------------------------------------|-------------------|------------------------------------|--------------------|--------------------|
|                                        | Robust<br>(%) (n) | Pre-frail/frail<br>(≥2)<br>(%) (n) | OR (95% CI)        | OR (95% CI)        |
| <b>BMI, kg/m<sup>2</sup></b>           | n= 2925           | n= 1125                            |                    |                    |
| Underweight                            | 0.4 (10)          | 0.7 (8)                            | 2.28 (0.89–5.88)   | 1.37 (0.49–3.89)   |
| Normal                                 | 48.0 (1404)       | 40.1 (451)                         | Ref.               | Ref.               |
| Overweight                             | 43.0 (1259)       | 41.7 (469)                         | 1.16 (0.99–1.36)   | 1.16 (0.99–1.36)   |
| Obesity                                | 8.6 (252)         | 17.5 (197)                         | 2.38 (1.92–2.95)   | 2.31 (1.83–2.92)   |
| <b>WC, cm</b>                          | n= 714            | n = 387                            |                    |                    |
| Normal                                 | 51.5 (368)        | 39.0 (151)                         | Ref.               | Ref.               |
| Moderately high                        | 31.1 (222)        | 33.1 (128)                         | 1.40 (1.05–1.87)*  | 1.50 (1.10–2.05)*  |
| High                                   | 17.4 (124)        | 27.9 (108)                         | 2.10 (1.52–2.89)*  | 2.19 (1.54–3.14)*  |
| <b>BMI and WC profile, baseline</b>    | n= 650            | n = 347                            |                    |                    |
| Normal BMI and normal WC               | 36.6 (238)        | 30.8 (107)                         | Ref.               | Ref.               |
| Normal BMI and moderately high/high WC | 8.0 (52)          | 6.4 (22)                           | 0.94 (0.54–1.63)*  | 0.92 (0.50–1.66)   |
| Overweight and normal WC               | 15.4 (100)        | 9.2 (32)                           | 0.73 (0.46– 1.15)* | 0.74 (0.45– 1.20)  |
| Overweight and moderately high/high WC | 32.0 (208)        | 34.9 (121)                         | 1.31 (0.95– 1.81)* | 1.47 (1.04–2.08)   |
| Obesity and moderately high/high WC    | 8.0 (52)          | 18.7 (65)                          | 2.73 (1.77– 4.20)* | 2.91 (1.83–4.65)   |
| <b>BMI trajectories</b>                | n= 653            | n = 348                            |                    |                    |
| Stable normal BMI                      | 26.9 (176)        | 22.1 (77)                          | Ref.               | Ref.               |
| Stable overweight                      | 46.6 (304)        | 41.1 (143)                         | 1.16 (0.83–1.63)   | 1.14 (0.79–1.63)   |
| Overweight to obese                    | 22.4 (146)        | 25.9 (90)                          | 1.53 (1.04–2.24)   | 1.55 (1.02–2.35)   |
| Increasing obesity                     | 4.1 (27)          | 10.9 (38)                          | 3.35 (1.90–5.90)   | 3.17 (1.72–5.85)   |
| <b>WC trajectories (women)</b>         | n= 287            | n = 172                            |                    |                    |
| Normal to moderately high WC           | 25.5 (73)         | 20.4 (35)                          | Ref.               | Ref.               |
| Moderately high to high WC             | 50.5 (145)        | 38.9 (67)                          | 0.98 (0.60–1.62)*  | 1.12 (0.65–1.93)*  |
| Gradually increasing high WC           | 20.9 (60)         | 33.7 (58)                          | 1.99 (1.15–3.43)*  | 2.02 (1.10–3.71)   |
| Steeply increasing high WC             | 3.1 (9)           | 7.0 (12)                           | 2.63 (1.01–6.86)*  | 3.30 (1.09–10.04)* |
| <b>WC trajectories (men)</b>           | n= 366            | n = 176                            |                    |                    |
| Normal WC                              | 21.6 (79)         | 17.6 (31)                          | Ref.               | Ref.               |
| Stable moderately high WC              | 41.5 (152)        | 36.4 (64)                          | 1.09 (0.66–1.81)*  | 1.03 (0.60–1.76)*  |
| Moderately high to high WC             | 32.2 (118)        | 29.6 (52)                          | 1.17 (0.69–1.99)*  | 1.06 (0.60–1.87)*  |
| Increasing high WC                     | 4.6 (17)          | 16.5 (29)                          | 4.51 (2.17–9.38)*  | 4.36 (1.94–9.80)*  |

# Analysis was restricted to individuals who were <60 years at Tromsø4

Model 1: adjusted for age and sex (\*excluding sex) at baseline.

Model 2: adjusted for age, sex, educational level, marital/cohabitation status, smoking status, alcohol intake, social support, self-perceived health, and physical activity level (\*excluding sex) at baseline.

BMI, body mass index; CI, confidence interval; OR, odds ratio; WC, waist circumference.

**Supplementary Table 6 Longitudinal association between BMI and WC, combined profiles and trajectories, and pre-frailty/frailty (frailty score  $\geq 2$ ): The Tromsø Study 1994–2016**

|                                        | Frailty status    |                                            | Model 1<br>OR (95% CI) | Model 2<br>OR (95% CI) |
|----------------------------------------|-------------------|--------------------------------------------|------------------------|------------------------|
|                                        | Robust<br>(%) (n) | Pre-frail/frail<br>( $\geq 2$ )<br>(%) (n) |                        |                        |
| <b>BMI, kg/m<sup>2</sup></b>           | n= 2925           | n= 199                                     |                        |                        |
| Underweight                            | 0.4 (10)          | 0.5 (1)                                    | 1.45 (0.18–11.98)      | 0.95 (0.11–7.85)       |
| Normal                                 | 48.0 (1404)       | 37.7 (75)                                  | Ref.                   | Ref.                   |
| Overweight                             | 43.0 (1259)       | 38.7 (77)                                  | 1.22 (0.87–1.71)       | 1.18 (0.82–1.71)       |
| Obesity                                | 8.6 (252)         | 23.1 (46)                                  | 3.47 (2.33–5.18)       | 3.27 (2.09–5.08)       |
| <b>WC, cm</b>                          | n= 714            | n = 88                                     |                        |                        |
| Normal                                 | 51.5 (368)        | 30.7 (27)                                  | Ref.                   | Ref.                   |
| Moderately high                        | 31.1 (222)        | 36.4 (32)                                  | 1.97 (1.15–3.38)*      | 1.98 (1.10–3.54)*      |
| High                                   | 17.4 (124)        | 32.9 (29)                                  | 3.20 (1.82–5.64)*      | 3.18 (1.71–5.93)*      |
| <b>BMI and WC profile, baseline</b>    | n= 650            | n = 81                                     |                        |                        |
| Normal BMI and normal WC               | 36.6 (238)        | 27.2 (22)                                  | Ref.                   | Ref.                   |
| Normal BMI and moderately high/high WC | 8.0 (52)          | 8.6 (7)                                    | 1.45 (0.59–3.59)       | 1.41 (0.52–3.86)       |
| Overweight and normal WC               | 15.4 (100)        | 3.7 (3)                                    | 0.33 (0.09–1.13)       | 0.37 (0.11– 1.31)      |
| Overweight and moderately high/high WC | 32.0 (208)        | 38.3 (31)                                  | 1.65 (0.92–2.95)       | 1.81 (0.97–3.38)       |
| Obesity and moderately high/high WC    | 8.0 (52)          | 22.2 (18)                                  | 3.79 (1.89– 7.62)      | 3.66 (1.71–7.81)       |

# Analysis was restricted to individuals who were <60 years at Tromsø4 and had frailty score  $\geq 2$

Model 1: adjusted for age and sex (\*excluding sex) at baseline.

Model 2: adjusted for age, sex, educational level, marital/cohabitation status, smoking status, alcohol intake, social support, self-perceived health, and physical activity level (\*excluding sex) at baseline.

BMI, body mass index; CI, confidence interval; OR, odds ratio; WC, waist circumference.

**Supplementary Table 7 Longitudinal association between BMI and WC, and pre-frailty/frailty among individuals with information on all five frailty criteria: The Tromsø Study 1994–2016**

|                              | Frailty status    |                            | Model 1<br>OR (95% CI) | Model 2<br>OR (95% CI) |
|------------------------------|-------------------|----------------------------|------------------------|------------------------|
|                              | Robust<br>(%) (n) | Pre-frail/frail<br>(%) (n) |                        |                        |
|                              | 70.4% (2016)      | 29.6% (848)                |                        |                        |
| <b>BMI, kg/m<sup>2</sup></b> |                   |                            |                        |                        |
| Underweight                  | 0.4 (8)           | 0.7 (6)                    | 1.98 (0.67–5.84)       | 0.97 (0.28–3.23)       |
| Normal                       | 48.4 (976)        | 40.1 (340)                 | Ref.                   | Ref.                   |
| Overweight                   | 42.8 (862)        | 42.9 (364)                 | 1.19 (0.99–1.42)       | 1.18 (0.97–1.43)       |
| Obesity                      | 8.4 (170)         | 16.3 (168)                 | 2.36 (1.82–3.05)       | 2.28 (1.72–3.01)       |
| <b>WC, cm</b>                | n = 600           | n = 350                    |                        |                        |
| Normal                       | 53.3 (320)        | 40.9 (143)                 | Ref.                   | Ref.                   |
| Moderately high              | 31.3 (188)        | 34.0 (119)                 | 1.40 (1.03–1.90)*      | 1.50 (1.08–2.08)*      |
| High                         | 15.3 (92)         | 25.1 (88)                  | 2.15 (1.51–3.08)*      | 2.15 (1.46–3.18)*      |

Model 1: adjusted for age and sex (\*excluding sex) at baseline.

Model 2: adjusted for age, sex, educational level, marital/cohabitation status, smoking status, alcohol intake, social support, self-perceived health, and physical activity level (\*excluding sex) at baseline.

BMI, body mass index; CI, confidence interval; OR, odds ratio; WC, waist circumference.



Supplementary Table 8 Longitudinal association between BMI and WC, and frailty components: The Tromsø Study 1994–2016

|                                  | Model 1<br>OR (95% CI) | Model 2<br>OR (95% CI) |
|----------------------------------|------------------------|------------------------|
| <b>Low grip strength</b>         |                        |                        |
| <b>BMI, kg/m<sup>2</sup></b>     |                        |                        |
| Underweight                      | 0.85 (0.11–6.63)       | 0.78 (0.10–6.17)       |
| Normal                           | Ref.                   | Ref.                   |
| Overweight                       | 1.45 (1.05–2.00)       | 1.34 (0.95–1.89)       |
| Obesity                          | 2.00 (1.31–3.05)       | 1.52 (0.95–2.43)       |
| <b>WC, cm</b>                    |                        |                        |
| Normal                           | Ref.                   | Ref.                   |
| Moderately high                  | 0.99 (0.58–1.68)*      | 0.92 (0.51–1.65)*      |
| High                             | 1.40 (0.81–2.43)*      | 1.37 (0.75–2.50)*      |
| <b>Low walking speed</b>         |                        |                        |
| <b>BMI, kg/m<sup>2</sup></b>     |                        |                        |
| Underweight                      | 4.51 (1.20–16.95)      | 3.03 (0.64–14.35)      |
| Normal                           | Ref.                   | Ref.                   |
| Overweight                       | 1.63 (1.12–2.37)       | 1.67 (1.12–2.48)       |
| Obesity                          | 3.32 (2.13–5.16)       | 3.15 (1.96–5.07)       |
| <b>WC, cm</b>                    |                        |                        |
| Normal                           | Ref.                   | Ref.                   |
| Moderately high                  | 2.24 (1.27–3.94)*      | 2.52 (1.38–4.63)*      |
| High                             | 2.65 (1.45–4.85)*      | 2.35 (1.19–5.63)*      |
| <b>Exhaustion</b>                |                        |                        |
| <b>BMI, kg/m<sup>2</sup></b>     |                        |                        |
| Underweight                      | 1.72 (0.22–13.18)      | 1.62 (0.20–13.24)      |
| Normal                           | Ref.                   | Ref.                   |
| Overweight                       | 1.11 (0.74–1.65)       | 1.06 (0.69–1.64)       |
| Obesity                          | 1.39 (0.793–2.42)      | 1.25 (0.69–2.27)       |
| <b>WC, cm</b>                    |                        |                        |
| Normal                           | Ref.                   | Ref.                   |
| Moderately high                  | 1.67 (0.75–3.72)*      | 1.67 (0.72–3.89)*      |
| High                             | 1.74 (0.72–4.20)*      | 1.69 (0.66–4.29)*      |
| <b>Unintentional weight loss</b> |                        |                        |
| <b>BMI, kg/m<sup>2</sup></b>     |                        |                        |
| Underweight                      | 2.84 (0.92–8.79)       | 2.15 (0.60–7.76)       |
| Normal                           | Ref.                   | Ref.                   |
| Overweight                       | 0.63 (0.49–0.82)       | 0.64 (0.49–0.85)       |
| Obesity                          | 0.68 (0.45–1.03)       | 0.70 (0.46–1.08)       |
| <b>WC, cm</b>                    |                        |                        |
| Normal                           | Ref.                   | Ref.                   |
| Moderately high                  | 0.99 (0.64–1.55)*      | 1.10 (0.70–1.73)*      |
| High                             | 0.57 (0.57–1.03)*      | 0.56 (0.30–1.07)*      |
| <b>Low physical activity</b>     |                        |                        |
| <b>BMI, kg/m<sup>2</sup></b>     |                        |                        |
| Underweight                      | –                      | –                      |
| Normal                           | Ref.                   | Ref.                   |
| Overweight                       | 1.42 (1.16–1.74)       | 1.43 (1.15–1.79)       |
| Obesity                          | 3.62 (2.81–4.68)       | 3.71 (2.80–4.90)       |
| <b>WC, cm</b>                    |                        |                        |
| Normal                           | Ref.                   | Ref.                   |
| Moderately high                  | 1.85 (1.24–2.78)*      | 1.71 (1.10–2.66)*      |
| High                             | 4.47 (2.97–6.72)*      | 4.94 (3.15–7.76)*      |

# Analysis was restricted to individuals who were <60 years at Tromsø4

Model 1: adjusted for age and sex (\*excluding sex) at baseline.

Model 2: adjusted for age, sex, educational level, marital/cohabitation status, smoking status, alcohol intake, social support, self-perceived health, and physical activity level (\*excluding sex) at baseline.

BMI, body mass index; CI, confidence interval; OR, odds ratio; WC, waist circumference.

**SUPPLEMENTARY FIGURES**

Supplementary Figure 1 Trajectories of individuals with repeated body mass index measurements between Tromsø4 and Tromsø7: The Tromsø Study 1994–2016.

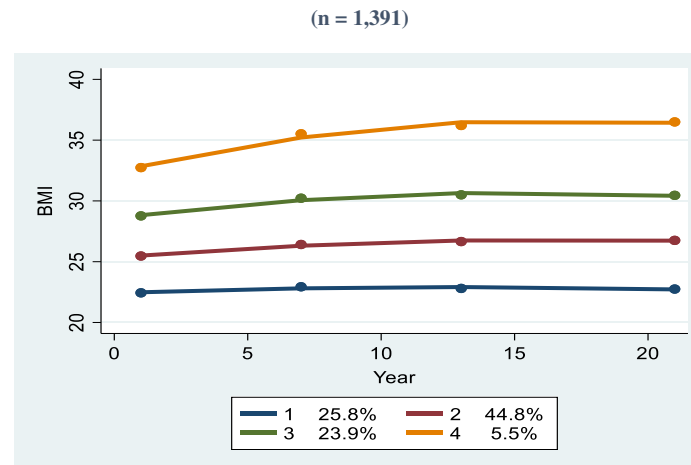

|         |                       |       |
|---------|-----------------------|-------|
| Group 1 | Stable normal weight  | 25.8% |
| Group 2 | Stable overweight     | 44.8% |
| Group 3 | Overweight to obesity | 23.9% |
| Group 4 | Increasing obesity    | 5.5%  |

Supplementary Figure 2 Trajectories of individuals with repeated waist circumference measurements between Tromsø4 and Tromsø7: The Tromsø Study 1994–2016.

(Males: n = 731; females n = 660)

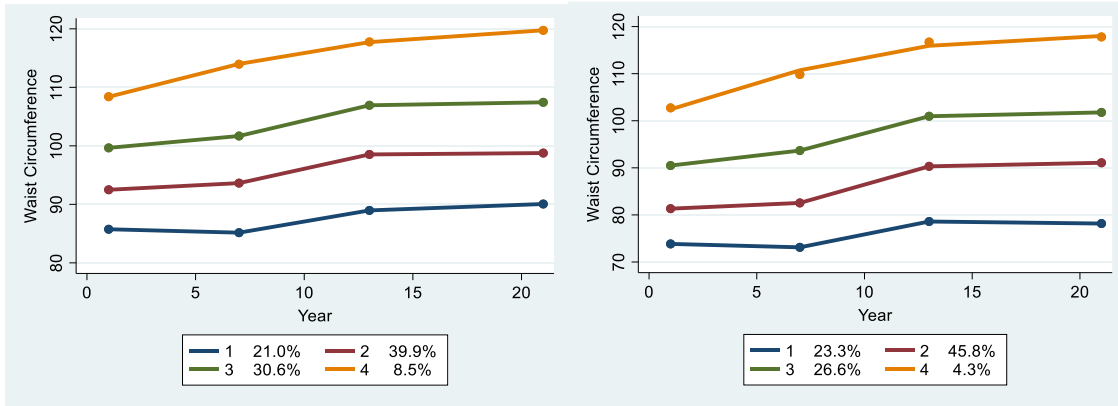

| Male    |                            |        |
|---------|----------------------------|--------|
| Group 1 | Stable normal WC           | 21.00% |
| Group 2 | Stable moderately high WC  | 39.90% |
| Group 3 | Moderately high to high WC | 30.60% |
| Group 4 | Increasing high WC         | 8.5 %  |

| Female  |                              |        |
|---------|------------------------------|--------|
| Group 1 | Stable normal WC             | 23.30% |
| Group 2 | Moderately high to high WC   | 45.80% |
| Group 3 | Gradually increasing high WC | 26.60% |
| Group 4 | Steeply increasing high WC   | 4.30%  |
